# Supplementary material
Source: PubMed Central journal article supplement (PMC2288538)
Supplement: neo1004_0314SD1.pdf [file neo1004_0314SD1.pdf]

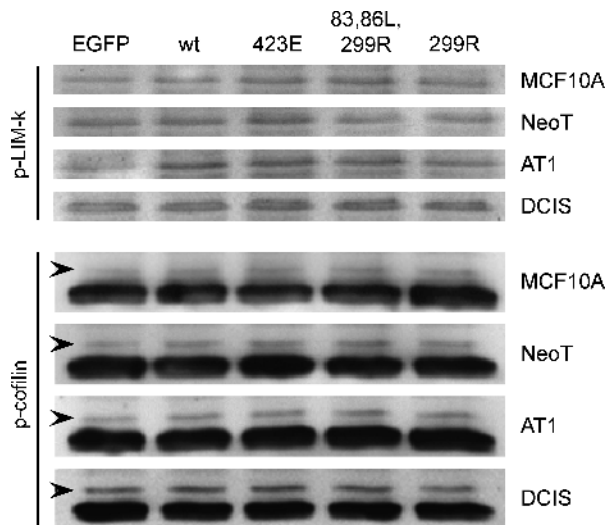

**Figure W1.** Overexpression of PAK1 constructs in the MCF10 progression series does not affect the LIM kinase/cofilin pathway. Cells were infected with retroviruses expressing the indicated PAK1 constructs. Cell lysates equalized for protein content were subjected to Western blot analysis for phospho-LIM kinase or phospho-cofilin. Note that the specific phospho-cofilin signal runs just above a nonspecific band and is indicated by an arrowhead. Results are representative of results from three independent experiments.

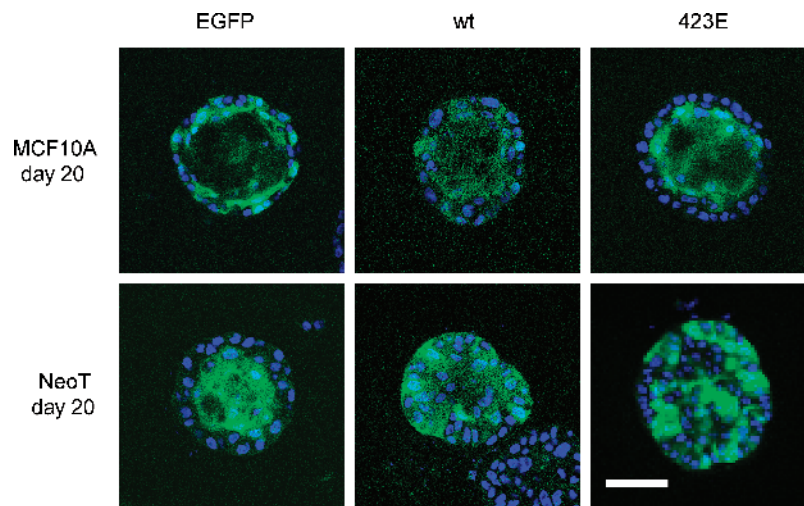

**Figure W2.** Overexpression of wild-type or CA-PAK1 suppresses luminal clearing in NeoT cells. MCF10A and NeoT cells were transfected as indicated. The structures were fixed after 20 days of 3D rBM overlay culture, and the nuclei were stained with DAPI. Confocal sections at an equatorial plane through the structures are shown as merged images of nuclei (blue) and EGFP reporter (green). Data are representative of results from three independent experiments. Scale bar, 50  $\mu$ m.
